# Supplementary figures and images for: Understanding the application of covalent adaptable networks in self-repair materials based on molecular simulation
Source: Royal Society of Chemistry journal article supplement (doi:10.1039/d3sm01364b), 2024-01-01

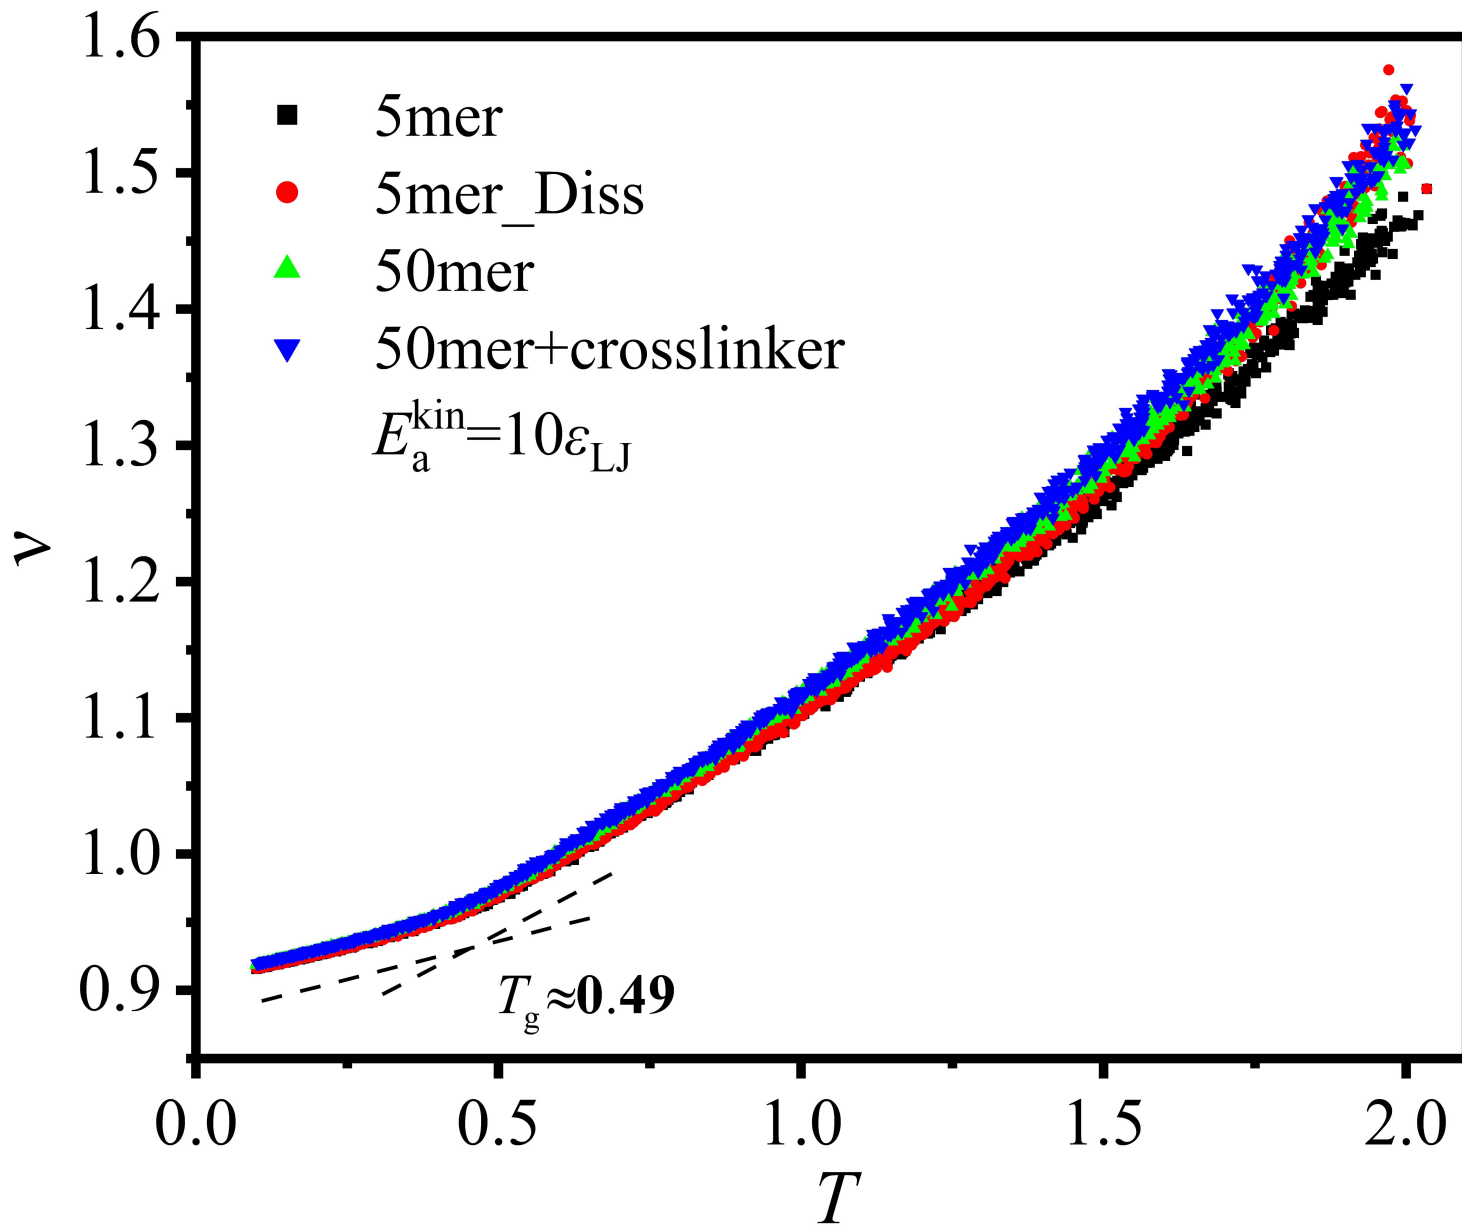

Supplement: d3sm01364b2.pdf [file d3sm01364b2.pdf]

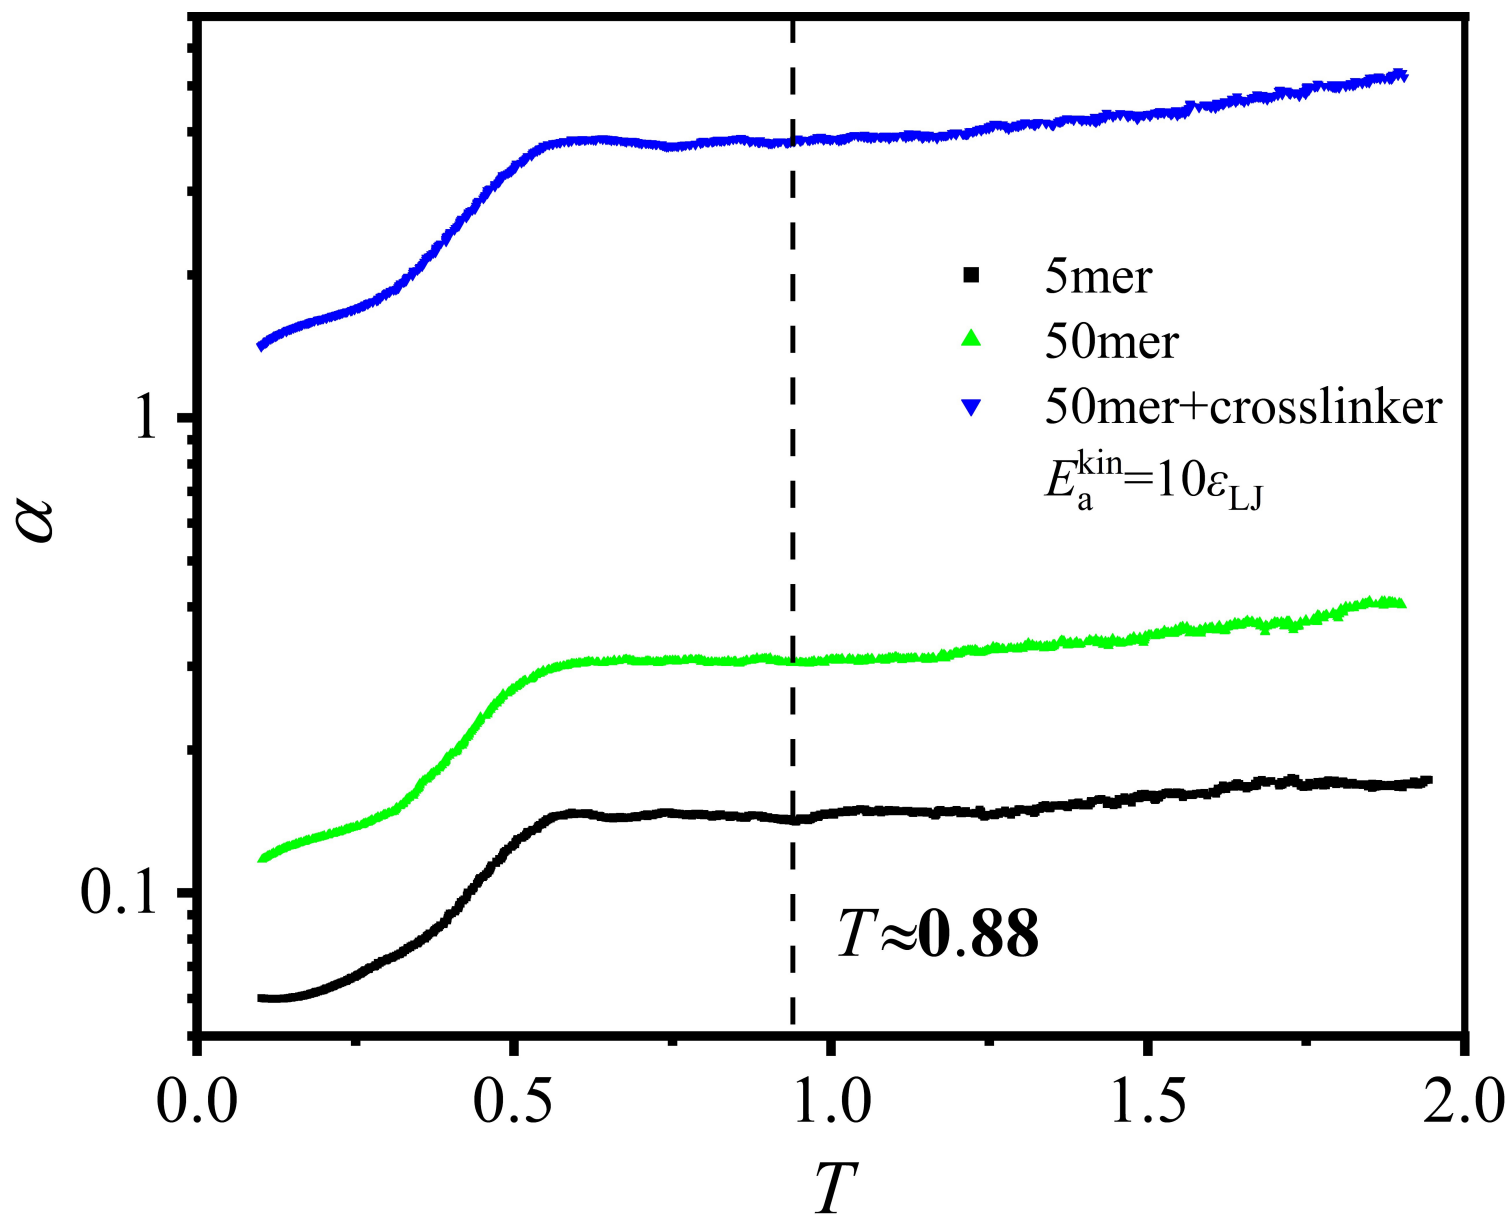

Supplement: d3sm01364b3.pdf [file d3sm01364b3.pdf]

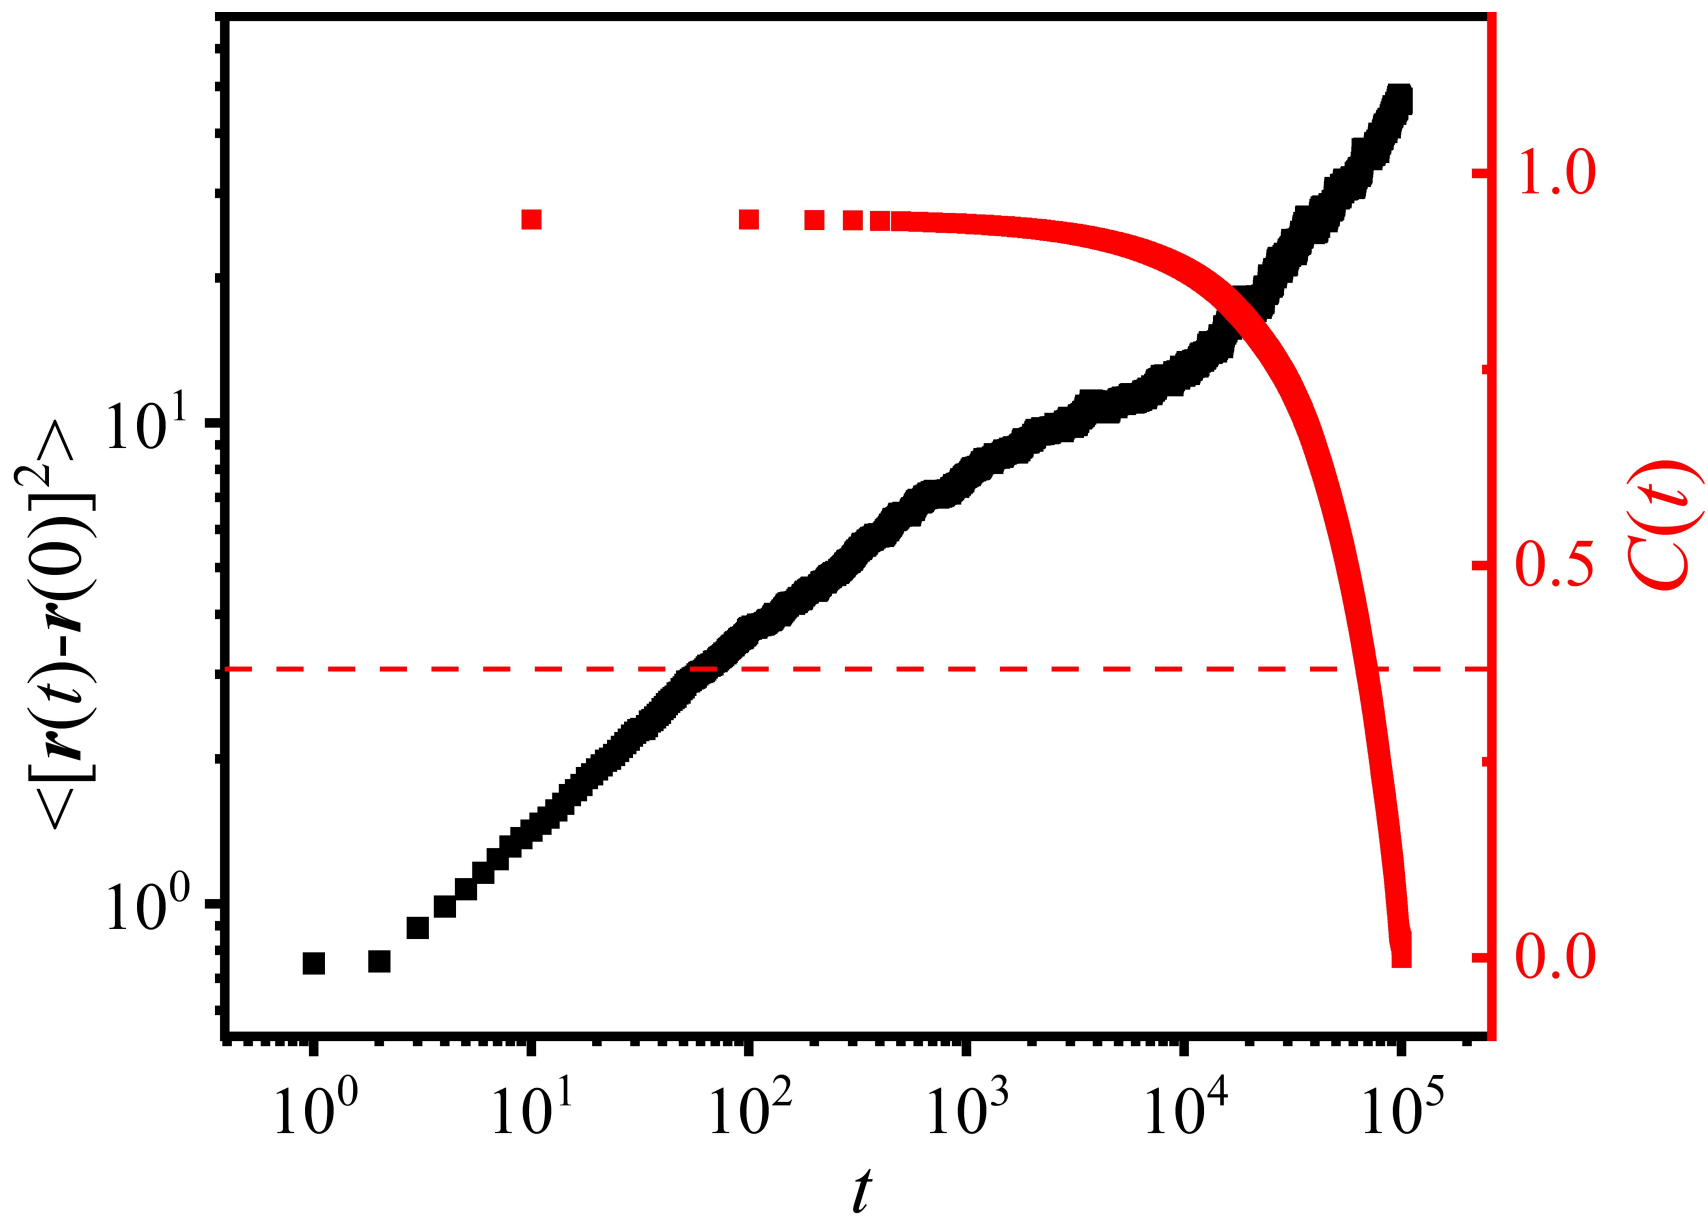

Supplement: d3sm01364b4.pdf [file d3sm01364b4.pdf]

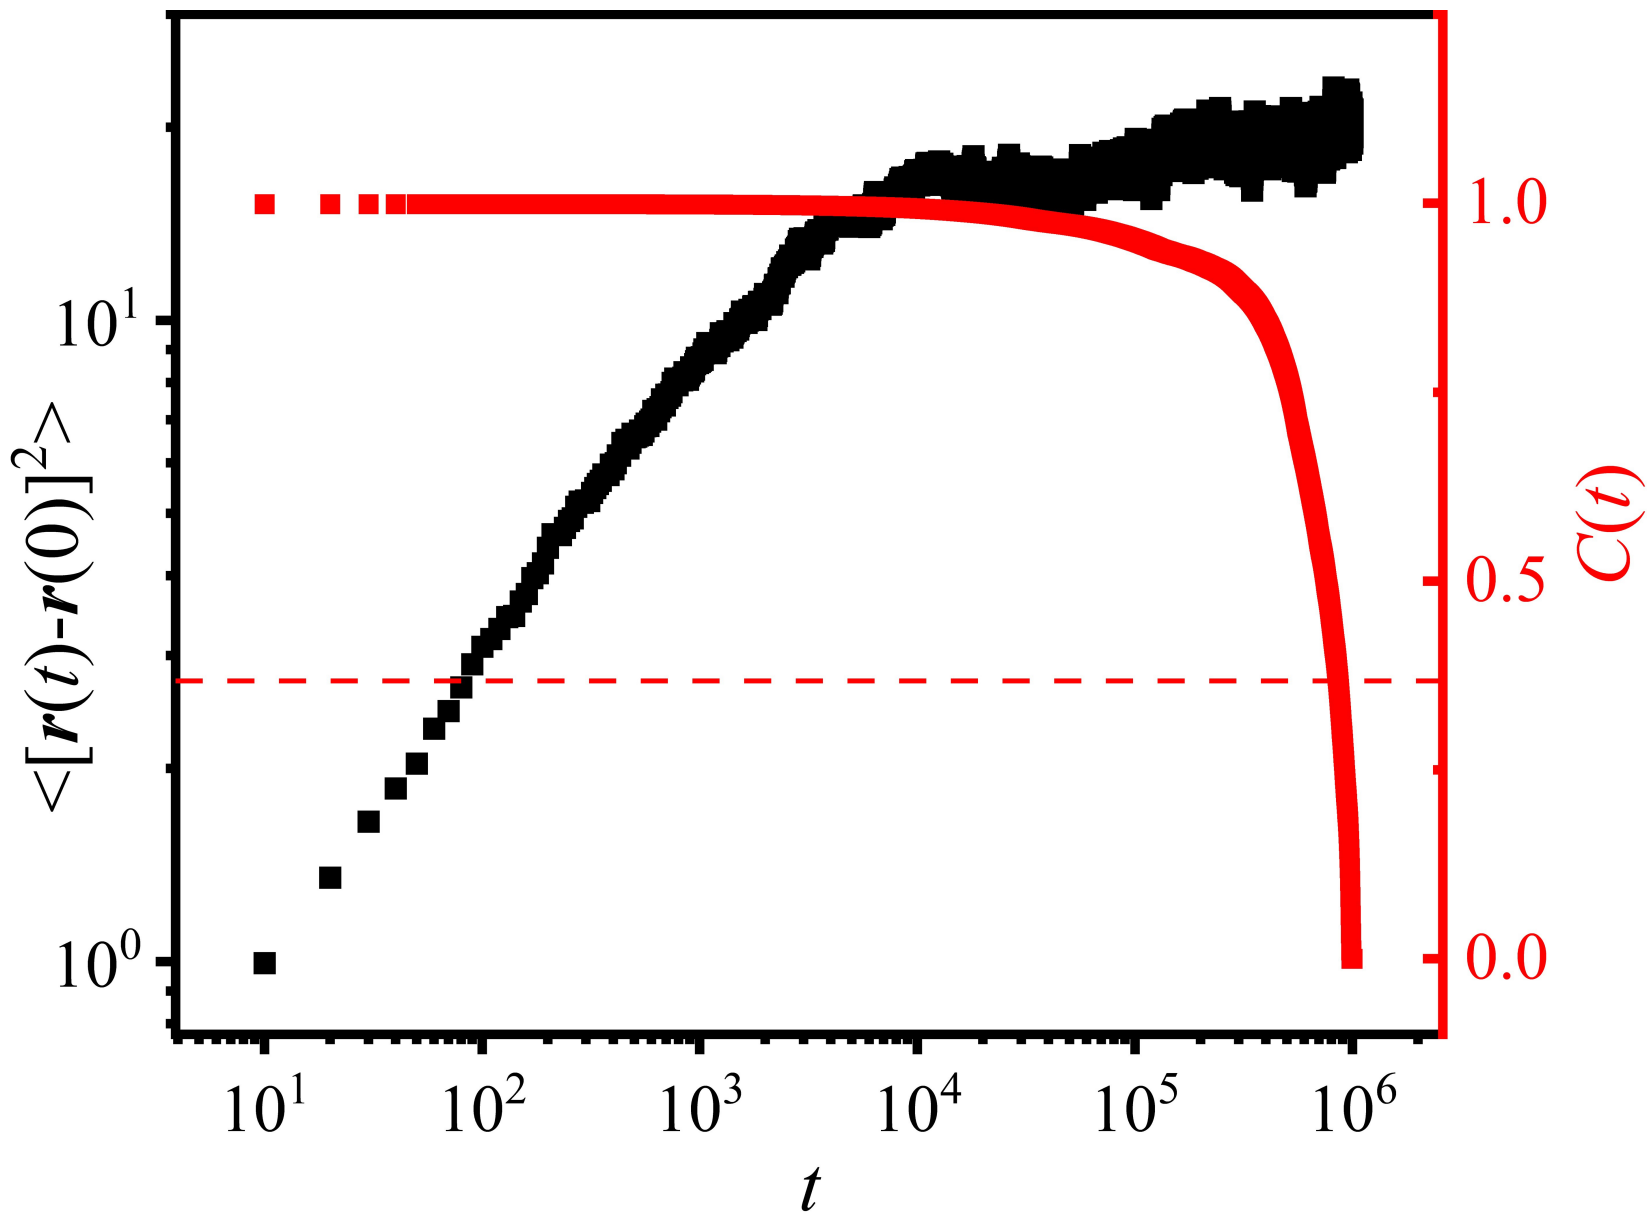

Supplement: d3sm01364b5.pdf [file d3sm01364b5.pdf]

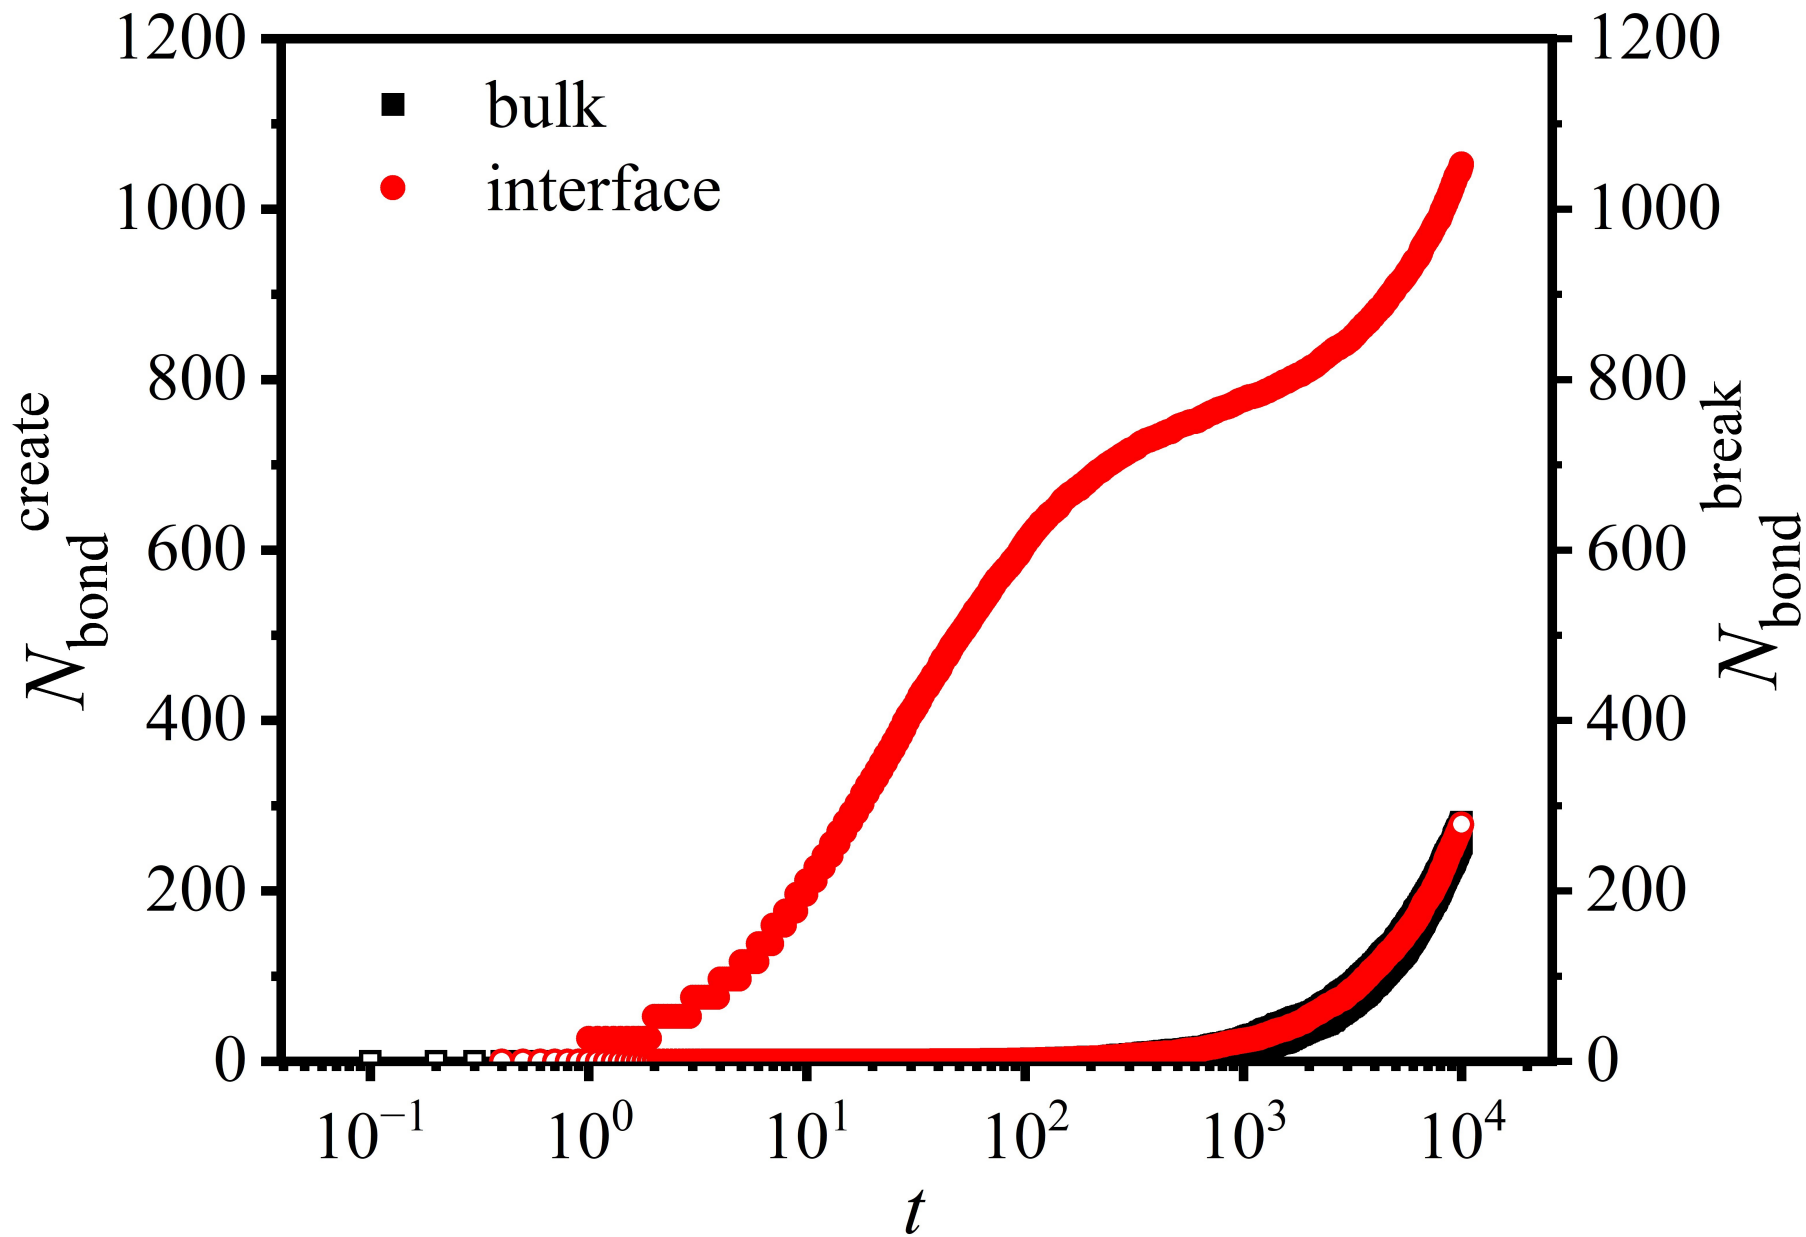

Supplement: d3sm01364b6.pdf [file d3sm01364b6.pdf]
